# Supplementary material for: Identification of the catalytically active component of Cu–Zr–O catalyst for the hydrogenation of levulinic acid to γ-valerolactone
Source: Royal Society of Chemistry journal article supplement (doi:10.1039/c6gc02598f), 2016-10-27
Supplement: c6gc02598f1.pdf [file c6gc02598f1.pdf]

Identification of the catalytically active component of Cu-Zr-O catalyst for  
the hydrogenation of levulinic acid to  $\gamma$ -valerolactone

Supplementary information

Satoshi Ishikawa<sup>a,b</sup>, Daniel R. Jones<sup>b</sup>, Sarwat Iqbal<sup>b</sup>, David J. Morgan<sup>b</sup>, David J.  
Willock<sup>b,\*</sup>, Jonathan K. Bartley<sup>b</sup>, Jennifer K. Edwards<sup>b</sup>, Toru Murayama<sup>a</sup>, Wataru  
Ueda<sup>a,c</sup>, Graham J. Hutchings<sup>b,\*</sup>

*Email:* [willockdj@cardiff.ac.uk](mailto:willockdj@cardiff.ac.uk)\*, [hutch@cardiff.ac.uk](mailto:hutch@cardiff.ac.uk)\*

<sup>a</sup> Catalysis Research Center, Hokkaido University, N-21, W-10, Sapporo, 001-0021,  
Japan

<sup>b</sup> Cardiff Catalysis Institute, School of Chemistry, Cardiff University, Main Building,  
Park Place, Cardiff, CF10 3AT, United Kingdom

<sup>c</sup> Department of Material and Life Chemistry, Faculty of Engineering, Kanagawa  
University, 3-27, Rokkakubashi, Kanagawa-ku, Yokohama, 221-8686, Japan

**Table of contents:**

**Table S1.** Lattice parameters and mixing energies for DFT calculations of Cu doping in 3x3x3 ZrO<sub>2</sub> lattice

**Table S2.** Physicochemical properties of catalysts prepared by Og or Dp method

**Figure S1.** Narrowed region of PXRD patterns of calcined and reduced catalysts

**Figure S2.** Raman spectra of t-ZrO<sub>2</sub>, 7.6Cu(Me), 10.7Cu(Og), 21.0Cu(Og), 31.3Cu(Og), 41.6Cu(Og), and 51.8Cu(Og).

**Figure S3.** XRD patterns of 14.8Cu(Me), 71.7Cu(Og), 91.7Cu(Og), 100Cu(Og).

**Figure S4.** Lattice parameters *c* as a function of Cu doping into the ZrO<sub>2</sub> lattice.

**Figure S5.** Mixing energy as a function of Cu doping into the ZrO<sub>2</sub> lattice.

**Figure S6.** XRD patterns of 51.8Cu(Og) catalyst before and after the reduction.

**Figure S7.** XRD patterns of 51.8Cu(Og), 51.8Cu(Og)-AR (Og), 51.8Cu(Og)-HR, 51.8Cu(Og)-AR-HR.

**Figure S8.** Arrhenius plot of the reaction.

**Figure S9.** TPR spectra of t-ZrO<sub>2</sub>, 7.6Cu(Me), 10.7Cu(Og), 2.5Cu/ 7.6Cu(Me), 41.6Cu(Og), 20Cu/t-ZrO<sub>2</sub>, and 20Cu/7.6Cu(Me).

**Figure S10.** TEM images of (a) 720Cu(Me), (b) 20Cu(Og), (c) 50Cu(Og).

**Table S1.** Lattice parameters and mixing energies for DFT calculations of Cu doping in 3x3x3 ZrO<sub>2</sub> lattice

| Doping % | $E_{mixing}/\text{eV}$ | $E_{mixing}/x/\text{eV}$ | Lattice Parameters (error) Å |             |             |
|----------|------------------------|--------------------------|------------------------------|-------------|-------------|
|          |                        |                          | $a$                          | $b$         | $c$         |
| 0%       | 0.00                   | 0.00                     | 3.59                         | 3.6         | 5.27        |
| 2%       | 0.71                   | 0.71                     | 3.59 (0.02)                  | 3.59 (0.02) | 5.20 (0.03) |
| 4%       | 3.29                   | 1.65                     | 3.58 (0.01)                  | 3.61 (0.02) | 5.20 (0.02) |
| 6%       | 5.79                   | 1.93                     | 3.57 (0.02)                  | 3.61 (0.01) | 5.19 (0.03) |
| 8%       | 7.61                   | 1.90                     | 3.58 (0.03)                  | 3.61 (0.03) | 5.18 (0.03) |

**Table S2.** Physicochemical properties of catalysts prepared by Dp or Og method

| Catalyst                   | Cu / (Cu + Zr) <sup>a</sup> | BET surface area <sup>b</sup> /m <sup>2</sup> g <sup>-1</sup> | CuO particle size <sup>c</sup> /nm | Cu particle size <sup>d</sup> /nm | Cu particle amount <sup>e</sup> /μmol g <sup>-1</sup> |
|----------------------------|-----------------------------|---------------------------------------------------------------|------------------------------------|-----------------------------------|-------------------------------------------------------|
| t-ZrO <sub>2</sub>         | 0.0                         | 43.4                                                          | -                                  | -                                 | -                                                     |
| 7.6Cu (Me)                 | 7.6                         | 64.3                                                          | -                                  | -                                 | 63                                                    |
| 10.7Cu (Og)                | 10.7                        | 62.6                                                          | -                                  | 7.6                               | 891                                                   |
| 2.5wt%Cu/7.6Cu (Me)        | 11.6                        | -                                                             | -                                  | 19.1                              | 671                                                   |
| 41.6Cu (Og)                | 41.6                        | 57.9                                                          | 8.5                                | 17.1                              | 4130                                                  |
| 20wt%Cu/t-ZrO <sub>2</sub> | 33.3                        | 44.2                                                          | 9.1                                | 50.2                              | 3831                                                  |
| 20wt%Cu/7.6Cu (Me)         | 36.9                        | 55.9                                                          | 8.5                                | 46.3                              | 3954                                                  |

<sup>a</sup> Determined by ICP. The value in bracket represents the bulk composition after the reduction.

<sup>b</sup> Obtained by N<sub>2</sub> adsorption at liq. N<sub>2</sub> temperature. Surface area in bracket is the one of the reduced catalysts.

<sup>c</sup> Obtained by XRD of the oxidized catalysts and estimated from scherrer equation.

<sup>d</sup> Obtained by XRD of the reduced catalysts and estimated from scherrer equation.

<sup>e</sup> Estimated by TPR signal area.

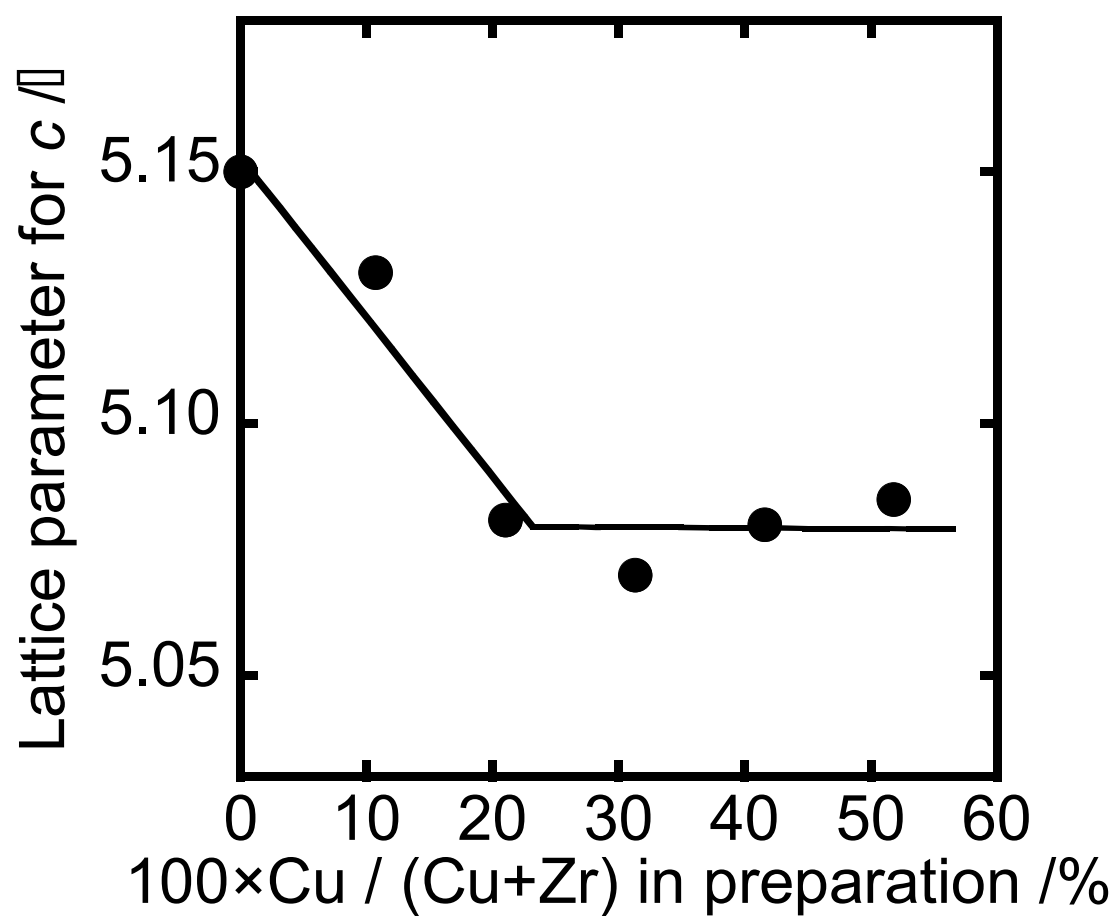

**Figure S1.** Narrowed region of PXRD patterns of calcined and reduced catalysts (for Figure 2)

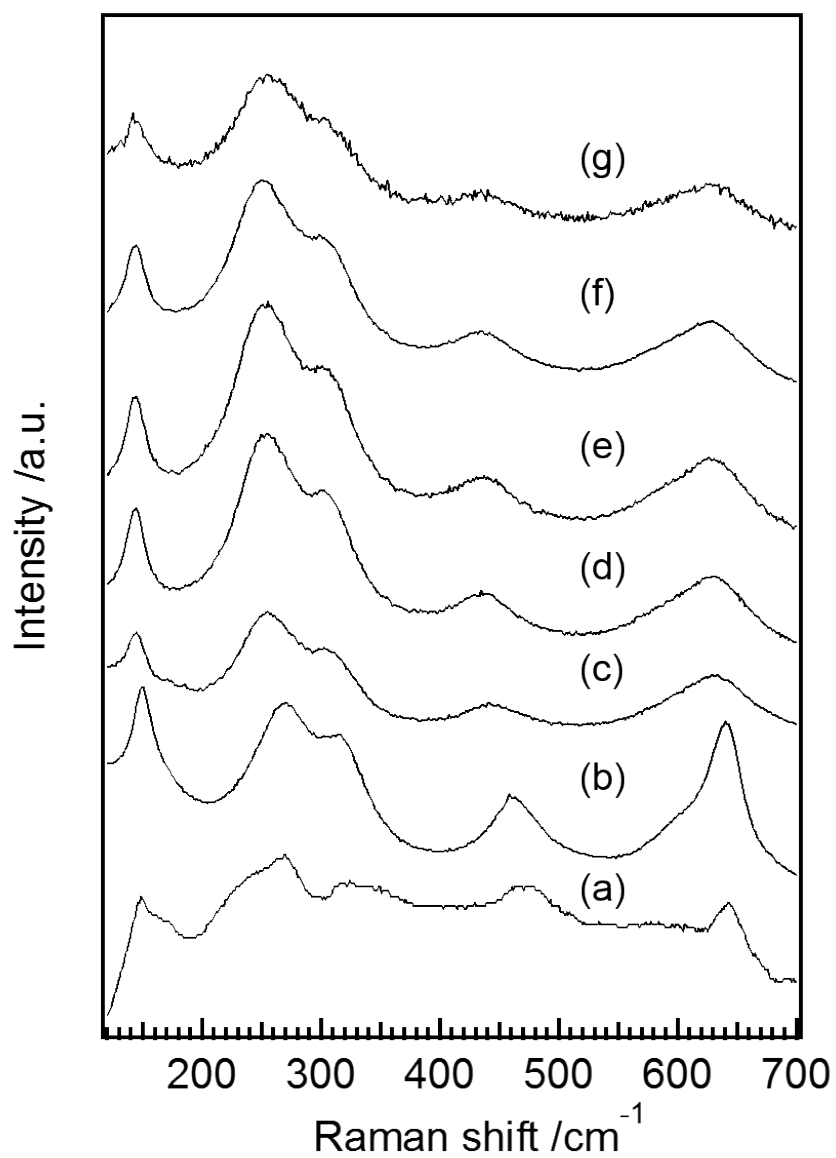

**Figure S2.** Raman spectra of (a) t-ZrO<sub>2</sub>, (b) 7.6Cu (Me), (c) 10.7Cu (Og), (d) 21.0Cu (Og), (e) 31.3Cu (Og), (f) 41.6Cu (Og), and (g) 51.8Cu (Og).

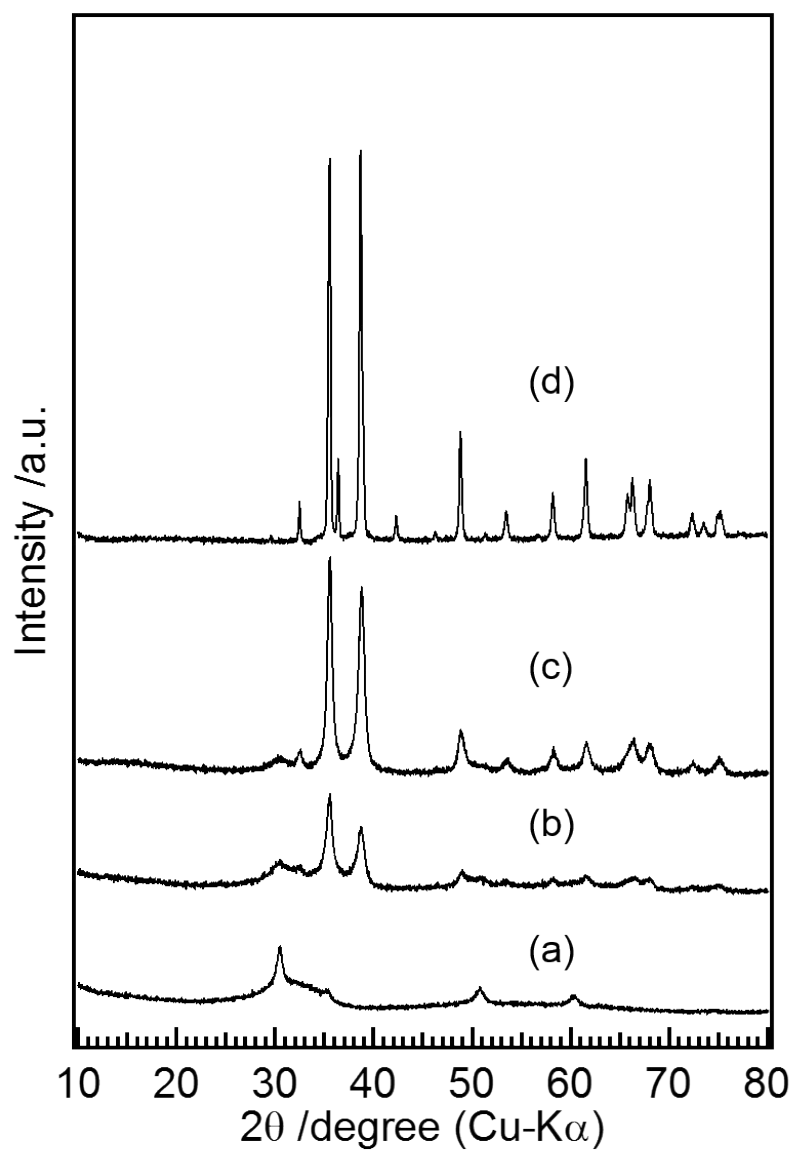

**Figure S3.** XRD patterns of (a) 14.8Cu (Me), (b) 71.7Cu (Og), (c) 91.7Cu (Og), (d) 100 Cu (Og).

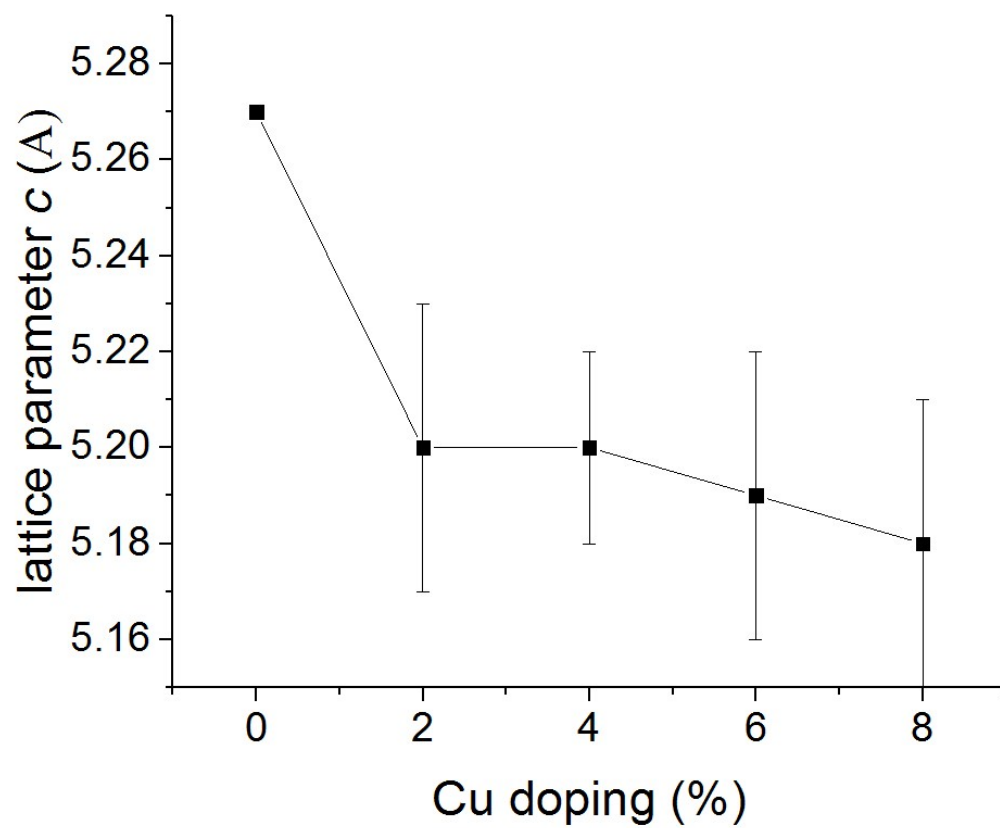

**Figure S4.** Lattice parameters  $c$  as a function of Cu doping into the  $\text{ZrO}_2$  lattice.

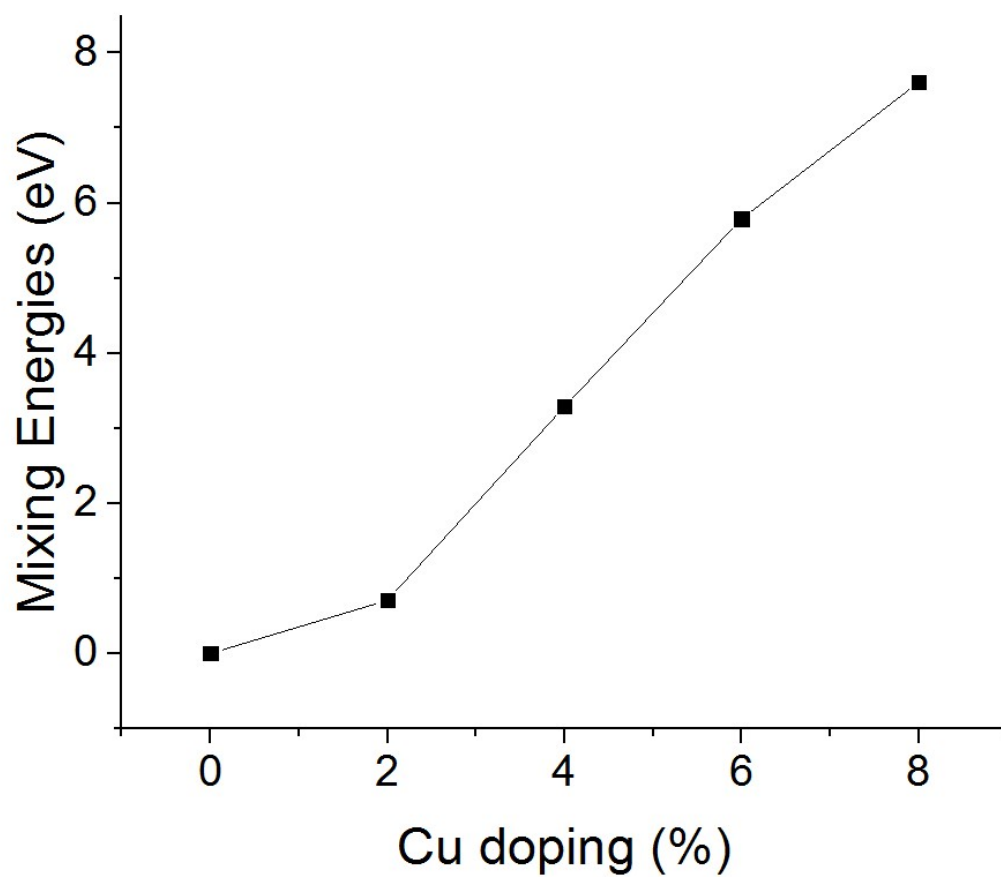

**Figure S5.** Mixing energy as a function of Cu doping into the ZrO<sub>2</sub> lattice.



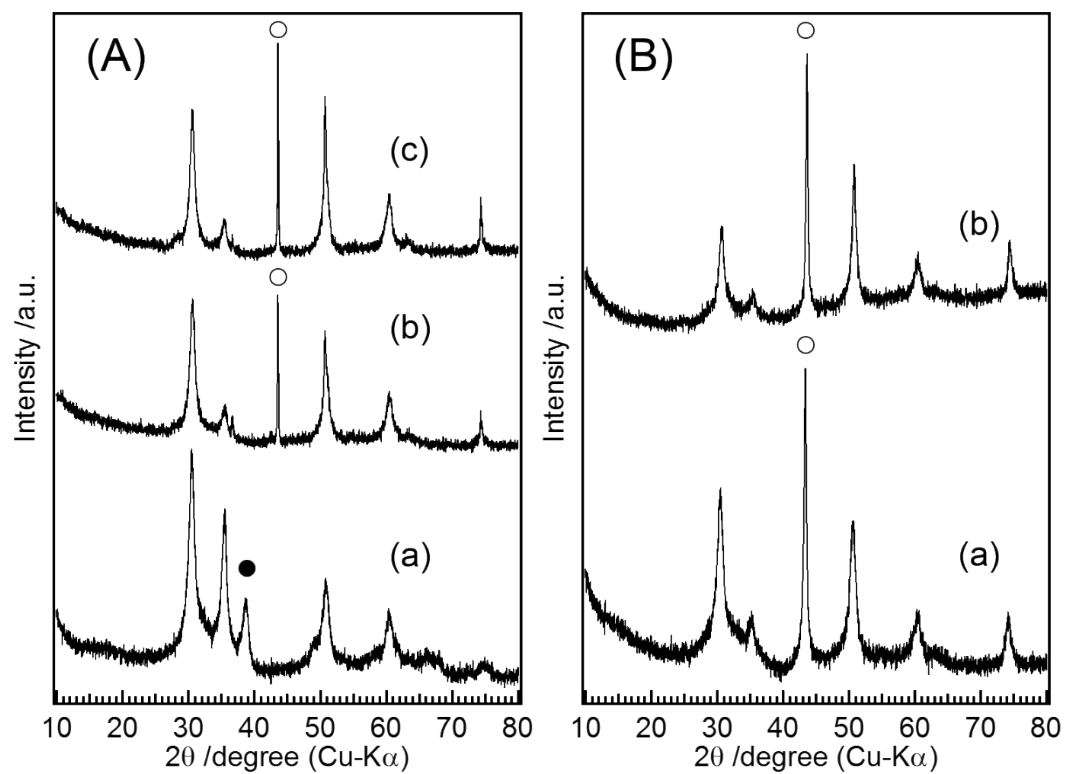

**Figure S6.** XRD patterns of 51.8Cu (Og) catalyst before (A) and after (B) the reduction.

(a) before the reaction, (b) after the reaction for 30 min, (c) after the reaction for 4 h.

● CuO. ○ Cu metal.

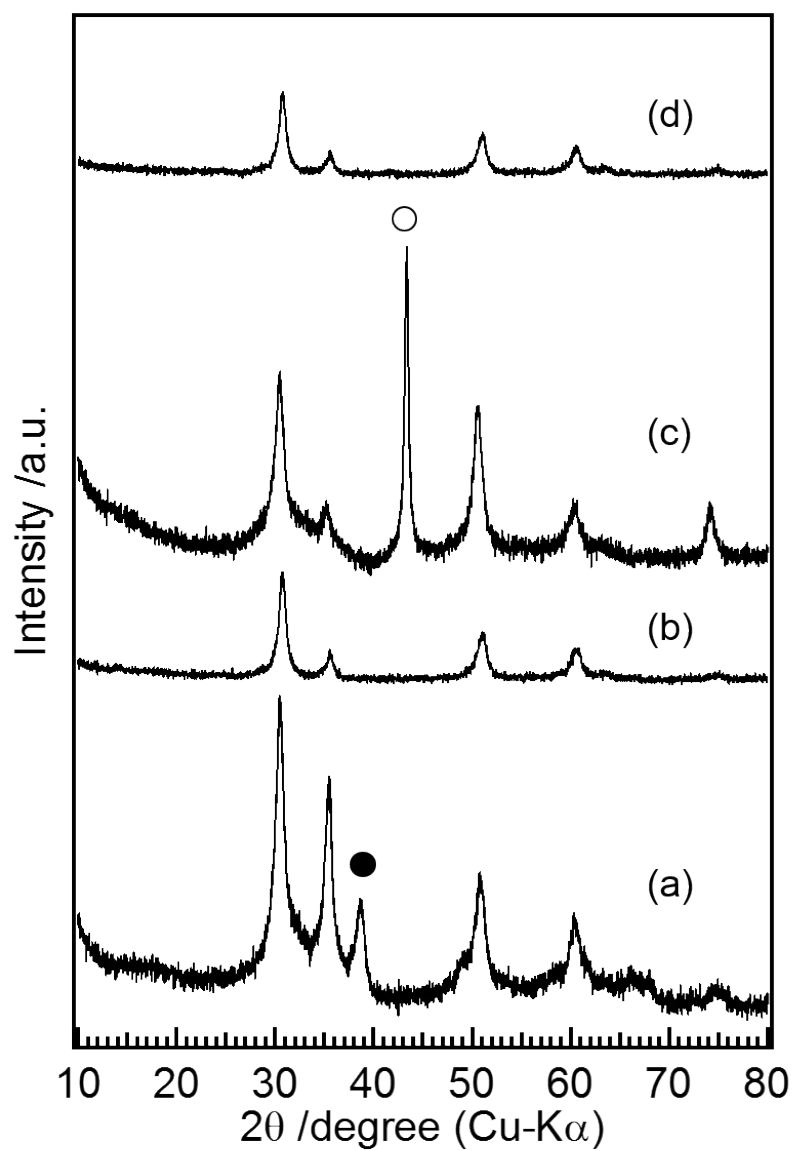

**Figure S7.** XRD patterns of (a) 51.8Cu (Og), (b) 51.8Cu (Og)-AR (Og), (c) 51.8Cu (Og)-HR, (d) 51.8Cu (Og)-AR-HR.  $\bullet$  CuO.  $\circ$  Cu metal.

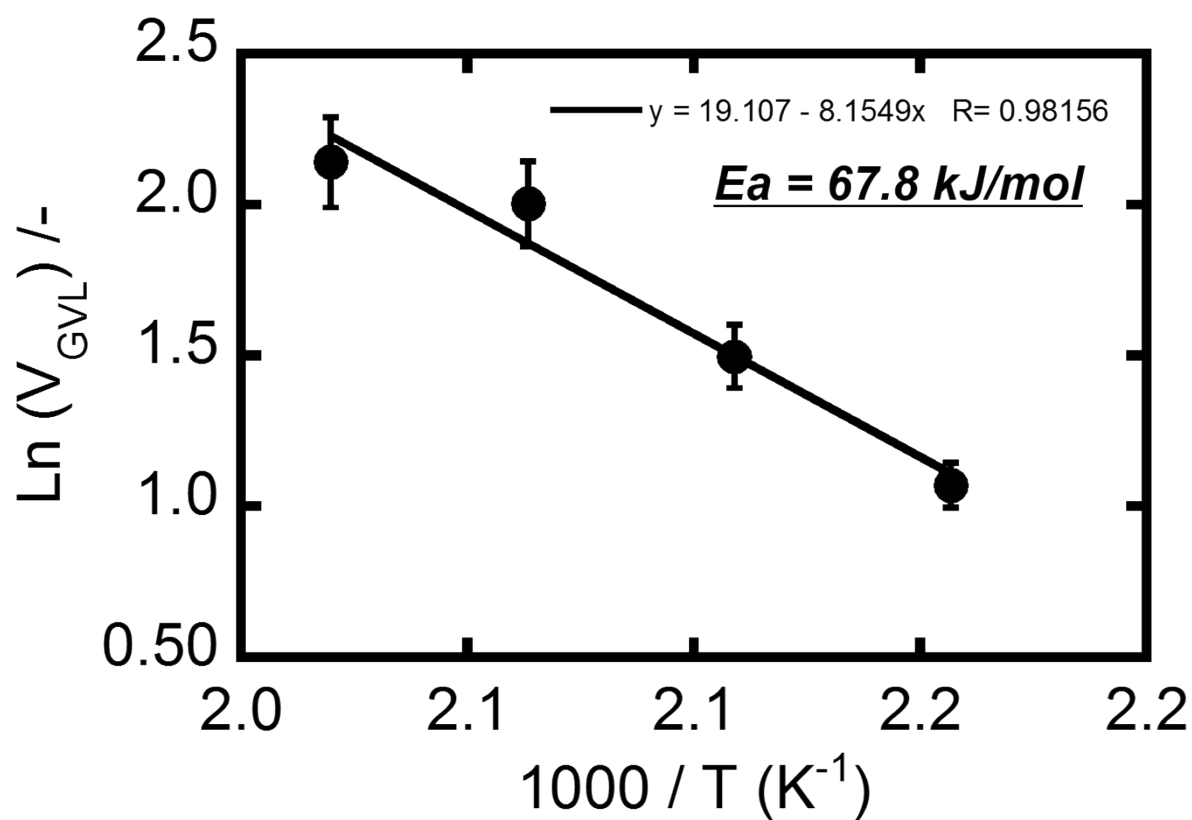

**Figure S8.** Arrhenius plot of the reaction. Catalyst amount was changed from 0.010 g to 0.025 g in order to set the LA conversion below 10%. *Reaction conditions:* 180 °C to 210 °C, 30 min, 35 barg  $\text{H}_2$ .

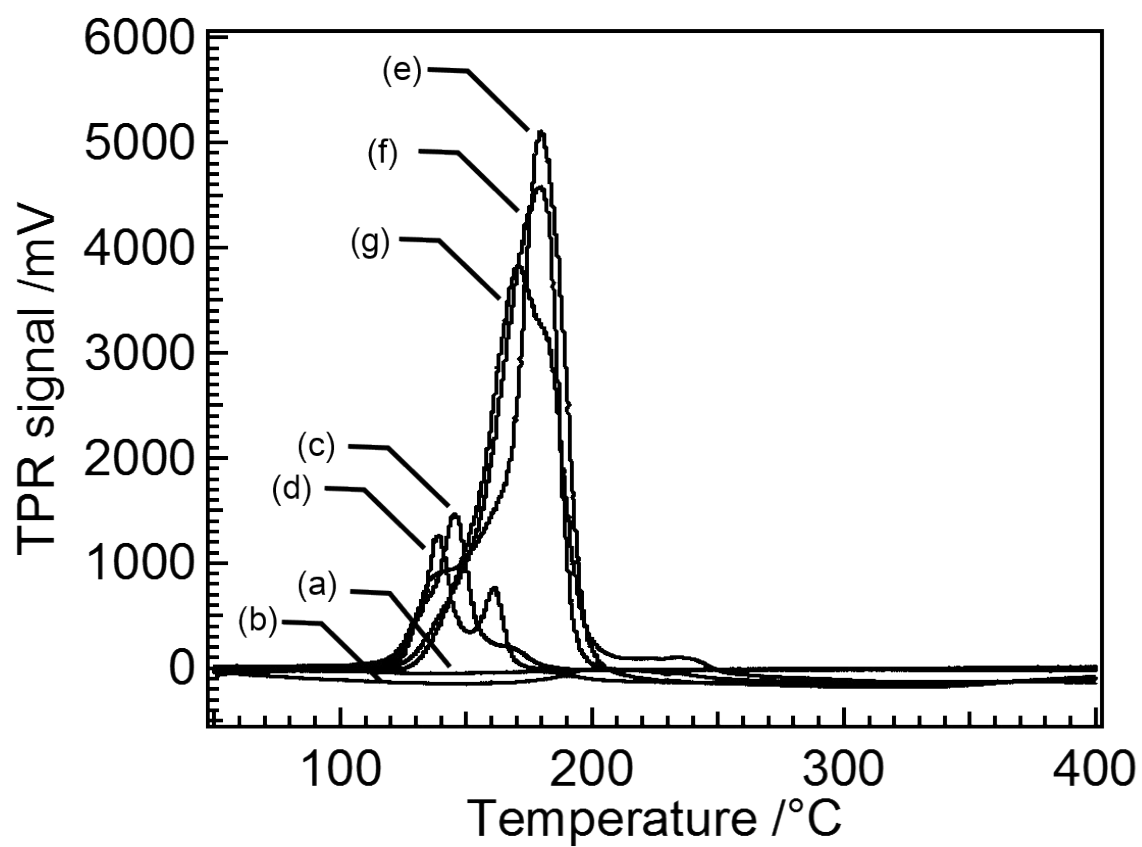

**Figure S9.** TPR spectra of (a) t-ZrO<sub>2</sub>, (b) 7.6Cu (Me), (c) 10.7Cu (Og), (d) 2.5Cu/ 7.6Cu (Me), (e) 41.6Cu (Og), (f) 20Cu/t-ZrO<sub>2</sub>, and (g) 20Cu/7.6Cu (Me).

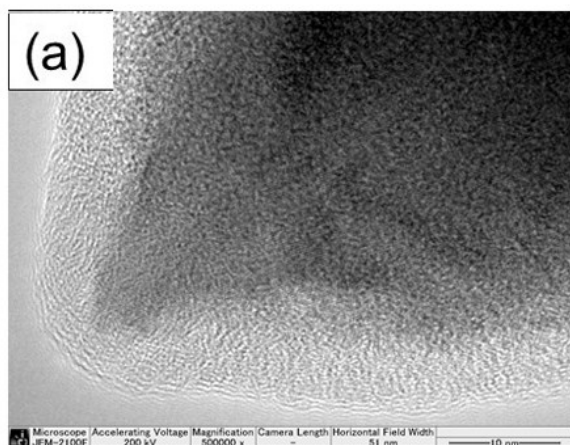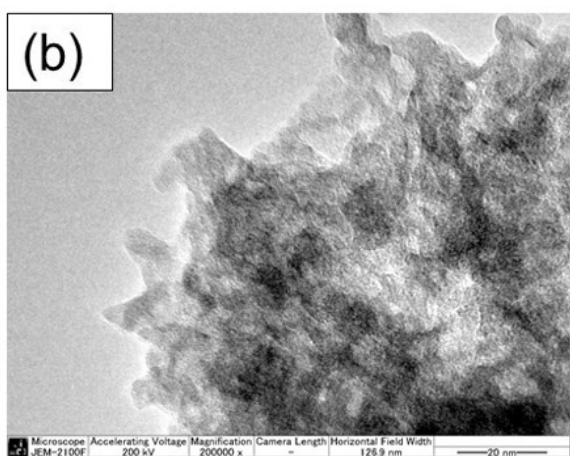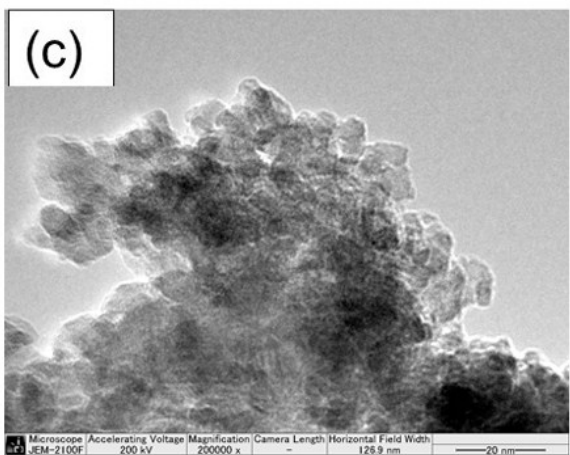

**Figure S10.** TEM images of (a) 720Cu(Me), (b) 20Cu(Og), (c) 50Cu(Og).

Cu particle and bulk Cu ratios of the catalysts were calculated as follows.

Cu amounts in the entire catalyst is

$$\text{Cu} : \text{Zr} = x : (100-x) \quad (1)$$

where  $x$  corresponds to the entire Cu ratio estimated by ICP.

$y$  g of catalyst was used for TPR analysis. Cu amount (gram) in  $y$  g is

$$(x/100) \times y \text{ (g)} = xy/100 \text{ (g)} \quad (2)$$

Theoretical Cu amount (mol) is  $(xy/100) / M_{\text{CuO}}$  (mol), where  $M_{\text{CuO}}$  corresponds molecular weight of CuO. Therefore, the theoretical entire Cu amount is

$$10^4 xy / M_{\text{CuO}} (\mu\text{mol}) / y \text{ (g)} = 10^4 x / M_{\text{CuO}} (\mu\text{mol g}^{-1}) \quad (3)$$

The ratio of Cu particles ( $\text{Cu}_{\text{sur}}$ ) is

$$\text{Cu}_{\text{sur}} = x \times \{ \text{CuO}_{\text{TPR}} / (10^4 x / M_{\text{CuO}}) \} = (\text{CuO}_{\text{TPR}} \times M_{\text{CuO}}) / 10^4 \quad (4)$$

where  $\text{CuO}_{\text{TPR}}$  corresponds to the CuO amount estimated by TPR ( $\mu\text{mol g}^{-1}$ ).

The ratio of Cu bulk ( $\text{Cu}_{\text{bulk}}$ ) is

$$\text{Cu}_{\text{bulk}} = x - \text{Cu}_{\text{sur}} \quad (5)$$
